# Supplementary material for: Achiral substituent- and stoichiometry-controlled inversion of supramolecular chirality and circularly polarized luminescence in ternary co-assemblies
Source: Royal Society of Chemistry journal article supplement (doi:10.1039/d4nr00392f), 2024-01-01
Supplement: d4nr00392f1.pdf [file d4nr00392f1.pdf]

## Supporting Information

### **Achiral Substituents- and Stoichiometry-Controlled Inversion of Supramolecular Chirality and Circularly Polarized Luminescence in Ternary Co-Assemblies**

Fang Wang\*, Liyun Lai, Min Liu, Quan Zhou\* and Shaoliang Lin\*

School of Materials Science and Engineering, East China University of Science and Technology, Shanghai 200237, China.

E-mail: [1509wangfang@ecust.edu.cn](mailto:1509wangfang@ecust.edu.cn) (Fang Wang), [qzhou@ecust.edu.cn](mailto:qzhou@ecust.edu.cn) (Quan Zhou), [slin@ecust.edu.cn](mailto:slin@ecust.edu.cn) (Shaoliang Lin).

## Experimental section

### Materials

All reagents and solvents were used as received without further purification. Dimethyl sulfoxide (DMSO), Fmoc-*L*-phenylalanine (**L-Phe**), Fmoc-*D*-phenylalanine (**D-Phe**), Fmoc-*L*-leucine (**L-Leu**) and Fmoc-*D*-leucine (**D-Leu**) were purchased from Macklin. 3-(1-Naphthyl) acrylic acid (**NC1**), 3-(2-Naphthyl) acrylic acid (**NC2**), 4-(1-naphthylvinyl) pyridine (**NP**) and 1,2,4,5-tetracyanobenzene (**TCNB**) were purchased from Bore. All water used in this work was deionized water which obtained from Titan.

### Preparation of assemblies

Self-assembly of different samples were triggered by a nanoprecipitation method. Taking the **L-Phe/NC1/TCNB** assemblies as an example, **L-Phe** (1.5 mg, 3.8 mmol), **NC1** (0.84 mg, 3.8 mmol) and **TCNB** (0.75 mg, 3.8 mmol) were dissolved in DMSO (50  $\mu$ L) by vigorous shaking in a septum-capped 5 mL glass vial. Then, by adding water (950  $\mu$ L) into the mixture, followed by aging at room temperature for at least 24 h, a yellow-color gel was eventually obtained, which was confirmed by the vial inversion test.

### Characterization

UV-vis spectra were recorded on a Shimadzu UV-2600i spectrometer (Shimadzu, Japan) at room temperature in a 10 mm quartz cell. Fluorescence spectra were measured using a Perkin Elmer LS 55 spectrometer (Perkin Elmer, America). Circular dichroism (CD) and circularly polarized luminescence (CPL) spectra of the gel, suspension and solution samples were measured in quartz cuvettes (light path length 1 mm) on JASCO J-810 and JASCO CPL-300 spectrophotometers (JASCO, Japan), respectively. Scanning electron microscopy (SEM) was performed on a S-4800 microscope (Hitachi, Japan) with an accelerating voltage of 15 kV. One drop of the as-prepared gel or suspension samples was deposited on a polished silicon wafer, followed by drying and coating with a thin layer of Au to enhance the contrast. Fourier transform infrared (FTIR) spectra were measured on IRAffinity-1 Fourier infrared spectrometer (Shimadzu, Japan). Powder X-ray diffraction (XRD) data were measured on an Ultima IV X-ray diffractometer (Rigaku, Japan) operated in  $2\theta$  range from 3° to 30.0° at room temperature.

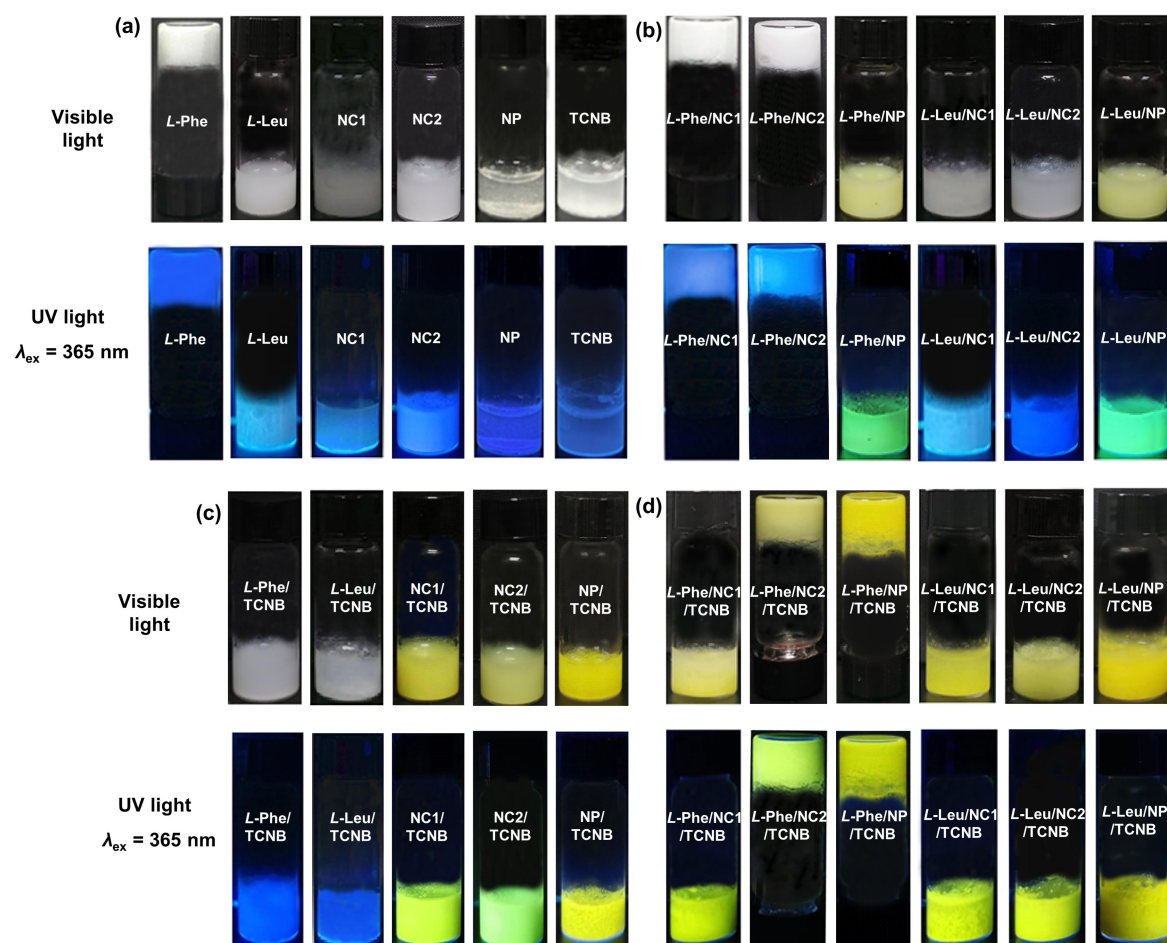

**Fig. S1** Photographs of (a) individual *L*-Phe, *L*-Leu, NC1, NC2, NP and TCNB (3.8 mM) assemblies, binary assemblies of (b) *L*-Phe/NC1, *L*-Phe/NC2, *L*-Phe/NP, *L*-Leu/NC1, *L*-Leu/NC2 and *L*-Leu/NP (3.8 mM:3.8 mM), and (c) *L*-Phe/TCNB, *L*-Leu/TCNB, NC1/TCNB, NC2/TCNB and NP/TCNB (3.8 mM:3.8 mM), and (d) ternary assemblies of *L*-Phe/NC1/TCNB, *L*-Phe/NC2/TCNB, *L*-Phe/NP/TCNB, *L*-Leu/NC1/TCNB, *L*-Leu/NC2/TCNB and *L*-Leu/NP/TCNB (3.8 mM:3.8 mM:3.8 mM) formed in DMSO/H<sub>2</sub>O (1/19, v/v) under visible light and UV light ( $\lambda_{\text{ex}} = 365 \text{ nm}$ ).

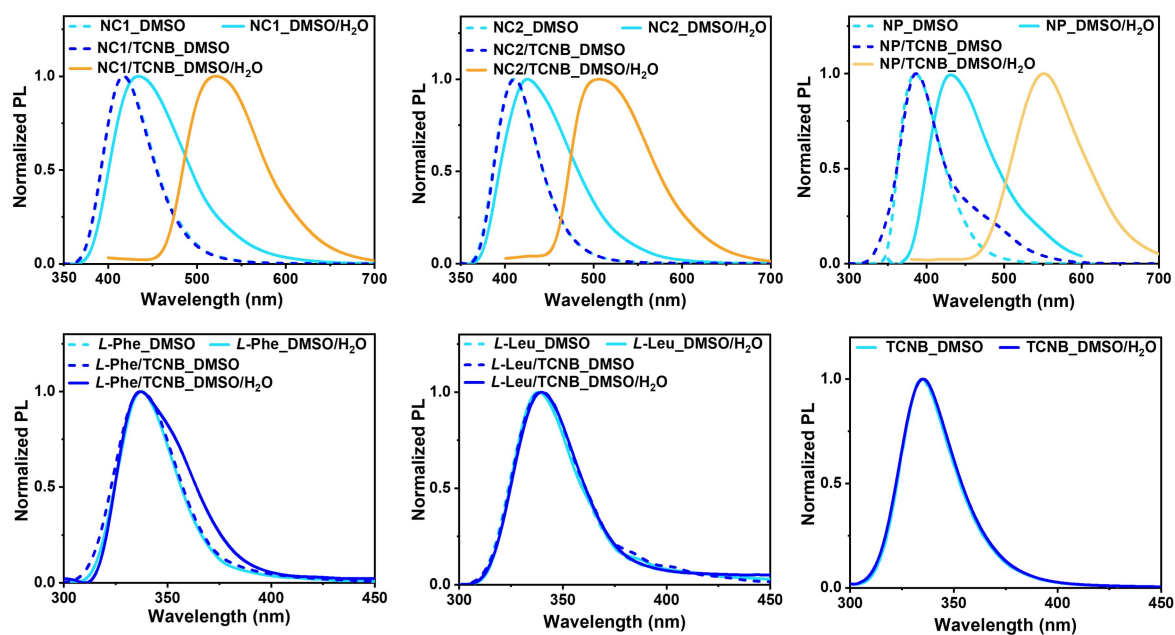

**Fig. S2** Normalized PL spectra of individual *L*-Phe, *L*-Leu, NC1, NC2, NP and TCNB (3.8 mM) in DMSO ( $\lambda_{\text{ex}} = 320$  nm for NC1 and NC2, and  $\lambda_{\text{ex}} = 280$  nm for NP, *L*-Phe, *L*-Leu and TCNB) and DMSO/H<sub>2</sub>O ( $\lambda_{\text{ex}} = 320$  nm for NC1, NC2 and NP, and  $\lambda_{\text{ex}} = 280$  nm for *L*-Phe, *L*-Leu and TCNB, 1/19, v/v), and NC1/TCNB, NC2/TCNB, NP/TCNB, *L*-Phe/TCNB and *L*-Leu/TCNB (3.8 mM:3.8 mM) in DMSO ( $\lambda_{\text{ex}} = 320$  nm for NC1/TCNB and NC2/TCNB, and  $\lambda_{\text{ex}} = 280$  nm for NP/TCNB, *L*-Phe/TCNB and *L*-Leu/TCNB) and DMSO/H<sub>2</sub>O ( $\lambda_{\text{ex}} = 360$  nm for NC1/TCNB, NC2/TCNB and NP/TCNB, and  $\lambda_{\text{ex}} = 280$  nm for *L*-Phe/TCNB and *L*-Leu/TCNB, 1/19, v/v).

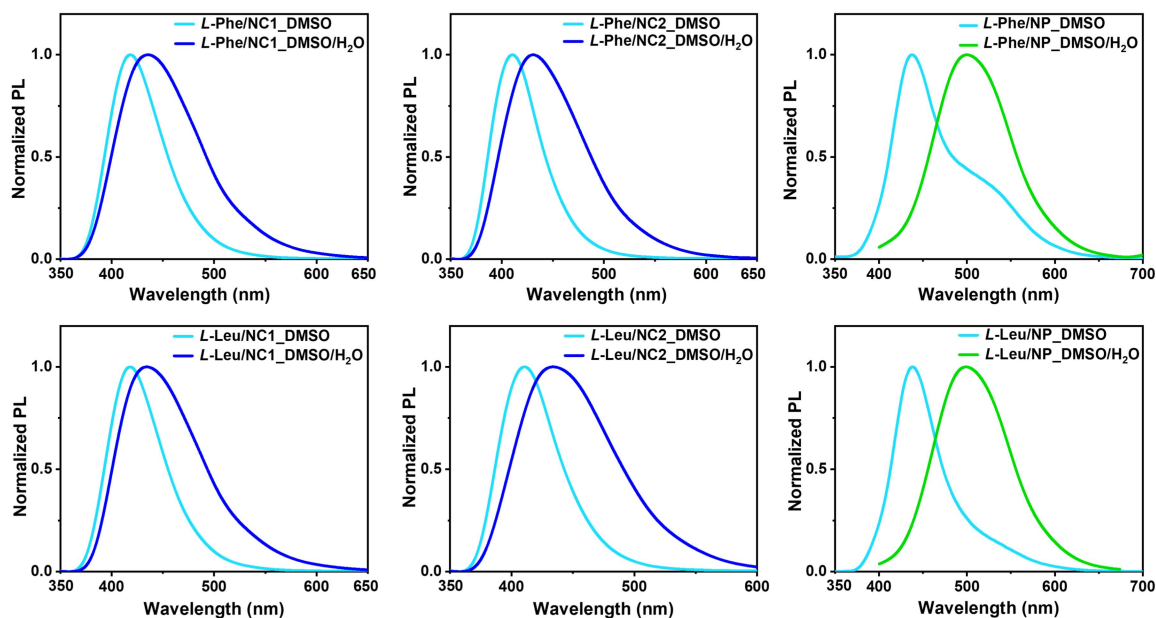

**Fig. S3** Normalized PL spectra of *L*-Phe/NC1, *L*-Phe/NC2, *L*-Phe/NP, *L*-Leu/NC1, *L*-Leu/NC2 and *L*-Leu/NP (3.8 mM:3.8 mM) in DMSO ( $\lambda_{\text{ex}} = 320$  nm) and DMSO/H<sub>2</sub>O ( $\lambda_{\text{ex}} = 320$  nm for *L*-Phe/NC1, *L*-Phe/NC2, *L*-Leu/NC1 and *L*-Leu/NC2, and  $\lambda_{\text{ex}} = 360$  nm for *L*-Phe/NP and *L*-Leu/NP, 1/19, v/v).

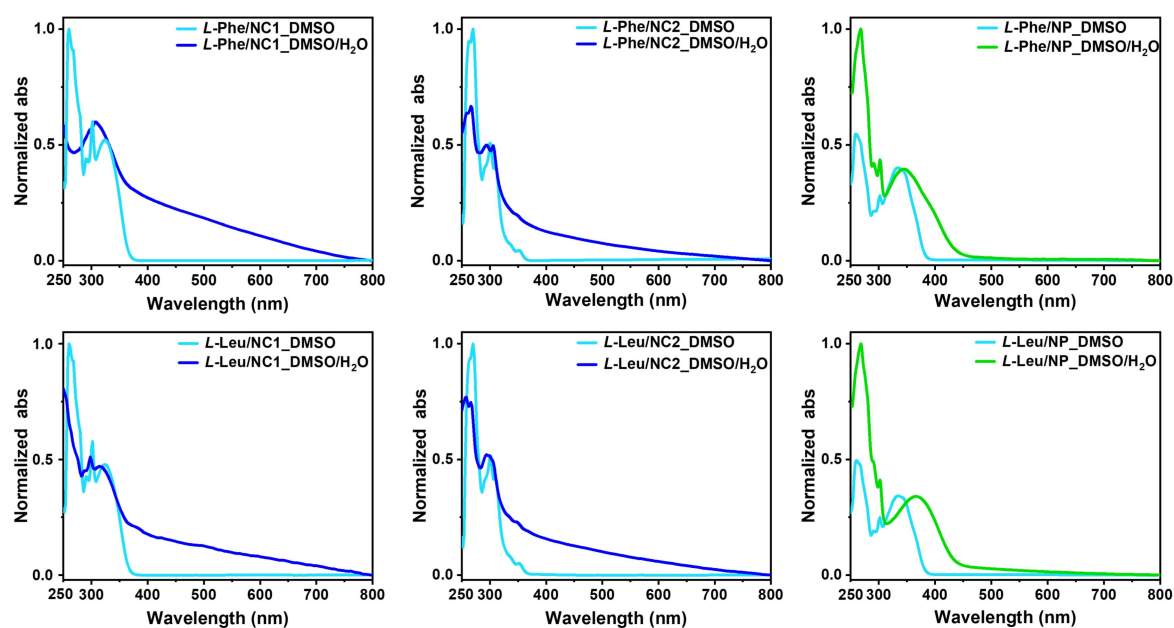

**Fig. S4** Normalized UV-vis spectra of *L*-Phe/NC1, *L*-Phe/NC2, *L*-Phe/NP, *L*-Leu/NC1, *L*-Leu/NC2 and *L*-Leu/NP (3.8 mM:3.8 mM) in DMSO and DMSO/H<sub>2</sub>O (1/19, v/v).

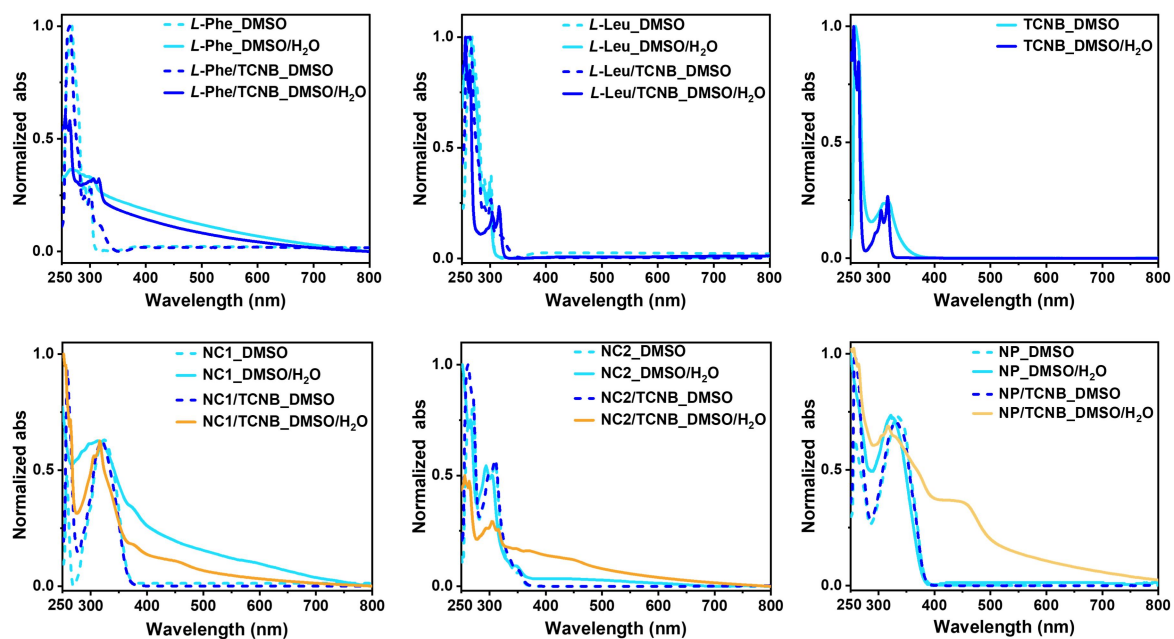

**Fig. S5** Normalized UV-vis spectra of individual *L*-Phe, *L*-Leu, NC1, NC2, NP and TCNB (3.8 mM), and *L*-Phe/TCNB, *L*-Leu/TCNB, NC1/TCNB, NC2/TCNB and NP/TCNB (3.8 mM:3.8 mM) in DMSO and DMSO/H<sub>2</sub>O (1/19, v/v).

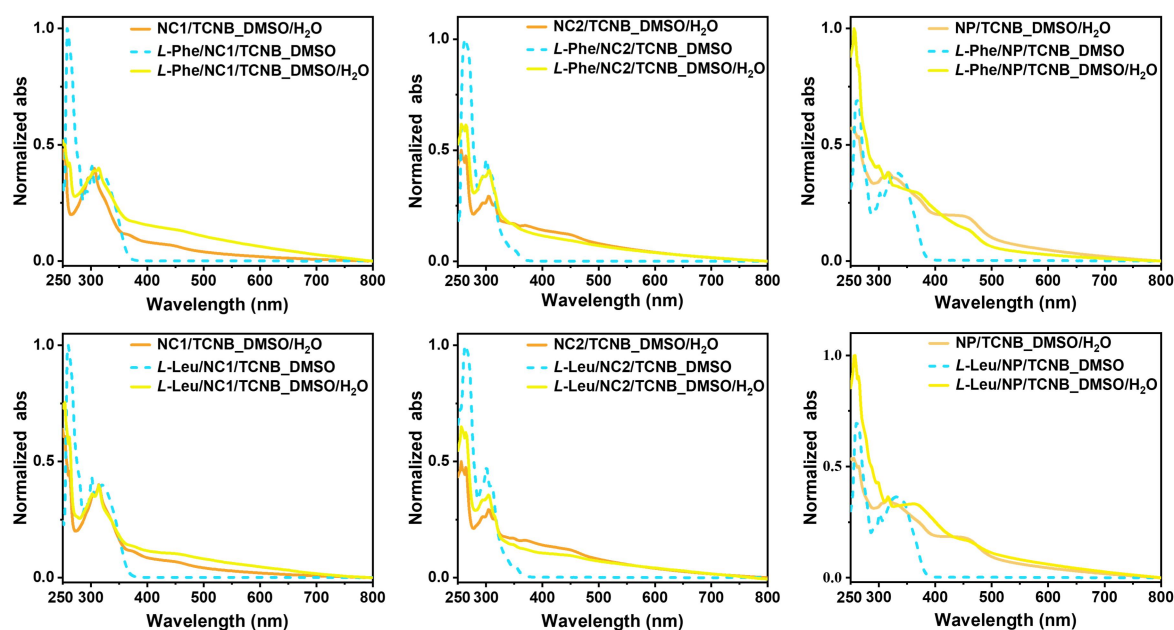

**Fig. S6** Normalized UV-vis spectra of **NC1/TCNB**, **NC2/TCNB** and **NP/TCNB** (3.8 mM:3.8 mM) in DMSO/H<sub>2</sub>O (1/19, v/v), and **L-Phe/NC1/TCNB**, **L-Phe/NC2/TCNB**, **L-Phe/NP/TCNB**, **L-Leu/NC1/TCNB**, **L-Leu/NC2/TCNB** and **L-Leu/NP/TCNB** (3.8 mM:3.8 mM:3.8 mM) in DMSO and DMSO/H<sub>2</sub>O (1/19, v/v).

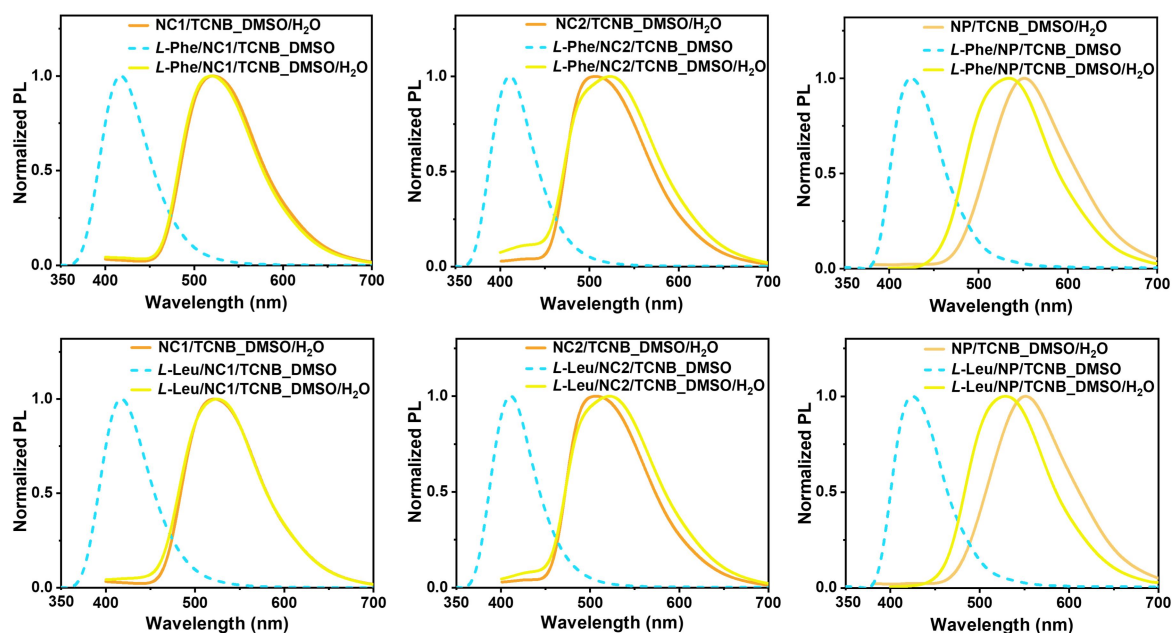

**Fig. S7** Normalized PL spectra of **NC1/TCNB**, **NC2/TCNB** and **NP/TCNB** (3.8 mM:3.8 mM) in DMSO/H<sub>2</sub>O (λ<sub>ex</sub> = 360 nm, 1/19, v/v), and **L-Phe/NC1/TCNB**, **L-Phe/NC2/TCNB**, **L-Phe/NP/TCNB**, **L-Leu/NC1/TCNB**, **L-Leu/NC2/TCNB** and **L-Leu/NP/TCNB** (3.8 mM:3.8 mM:3.8 mM) in DMSO (λ<sub>ex</sub> = 320 nm) and DMSO/H<sub>2</sub>O (λ<sub>ex</sub> = 360 nm, 1/19, v/v).

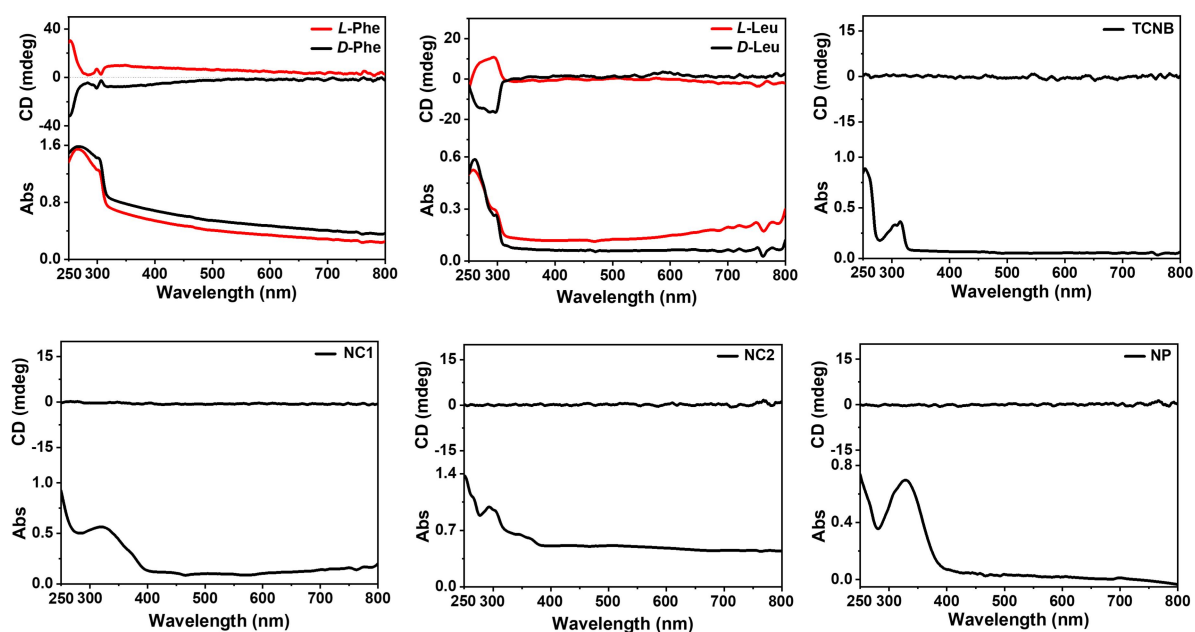

**Fig. S8** CD and UV-vis spectra of individual *L*- or *D*-Phe, *L*- or *D*-Leu, NC1, NC2, NP and TCNB (3.8 mM) assemblies formed in DMSO/H<sub>2</sub>O (1/19, v/v).

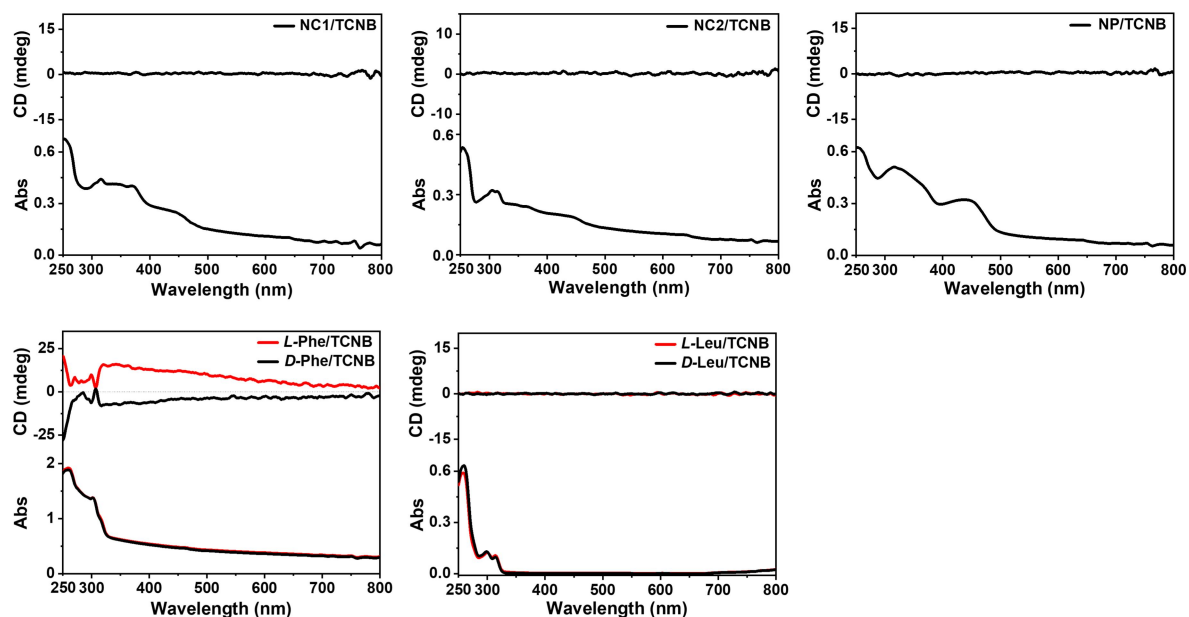

**Fig. S9** CD and UV-vis spectra of NC1/TCNB, NC2/TCNB, NP/TCNB, *L*- or *D*-Phe/TCNB, and *L*- or *D*-Leu/TCNB (3.8 mM:3.8 mM) assemblies formed in DMSO/H<sub>2</sub>O (1/19, v/v).

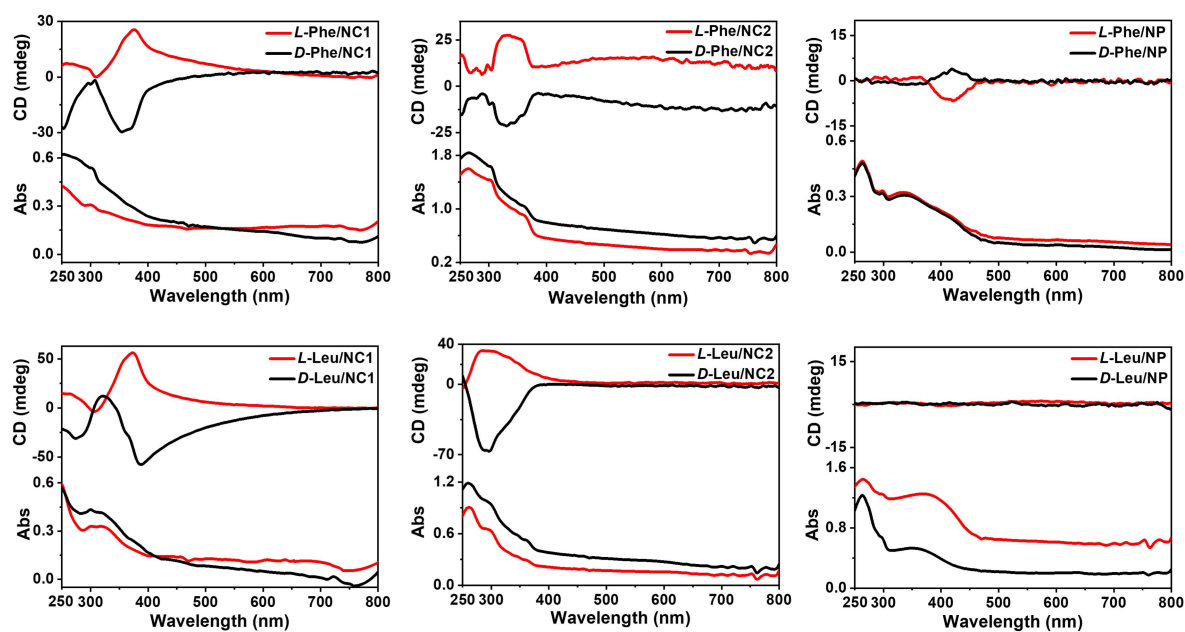

**Fig. S10** CD and UV-vis spectra of *L*- or *D*-Phe/NC1, *L*- or *D*-Phe/NC2, *L*- or *D*-Phe/NP, *L*- or *D*-Leu/NC1, *L*- or *D*-Leu/NC2, and *L*- or *D*-Leu/NP (3.8 mM:3.8 mM) assemblies formed in DMSO/H<sub>2</sub>O (1/19, v/v).

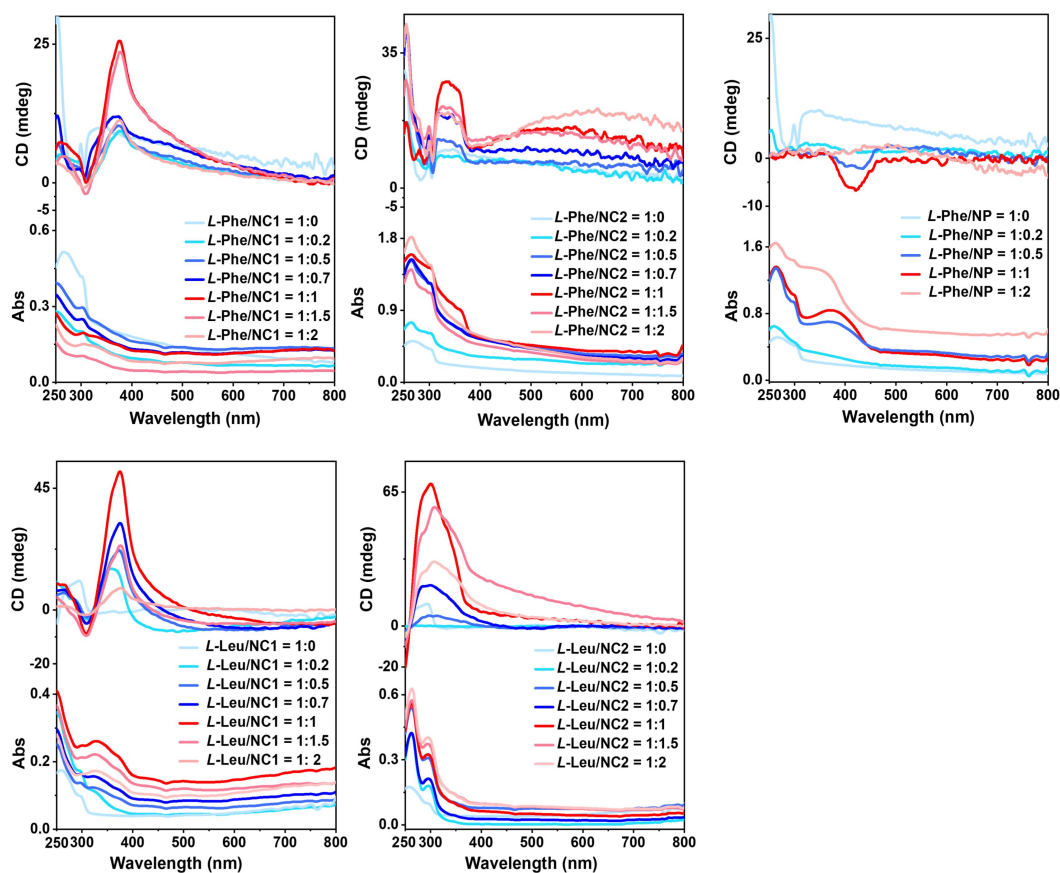

**Fig. S11** Molar ratio-dependent CD and UV-vis spectra of *L*-Phe/NC1, *L*-Phe/NC2, *L*-Phe/NP, *L*-Leu/NC1 and *L*-Leu/NC2 in DMSO/H<sub>2</sub>O (1/19, v/v).

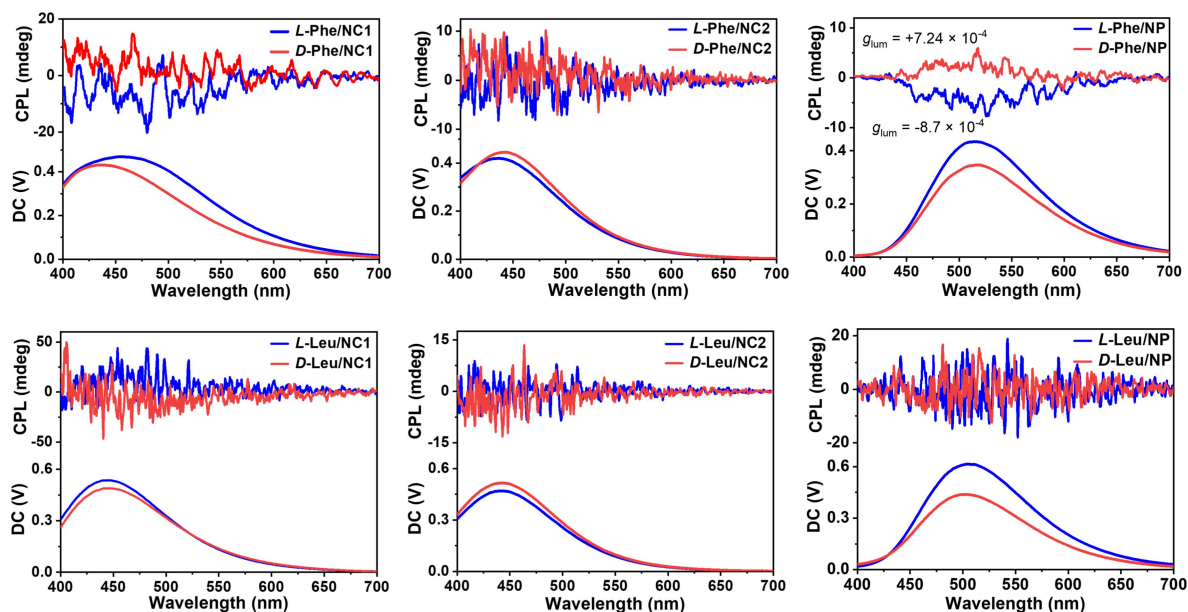

**Fig. S12** CPL spectra of *L*- or *D*-Phe/NC1, *L*- or *D*-Phe/NC2, *L*- or *D*-Phe/NP, *L*- or *D*-Leu/NC1, *L*- or *D*-Leu/NC2, and *L*- or *D*-Leu/NP (3.8 mM:3.8 mM) in DMSO/H<sub>2</sub>O (1/19, v/v) excited by 320 nm UV light.

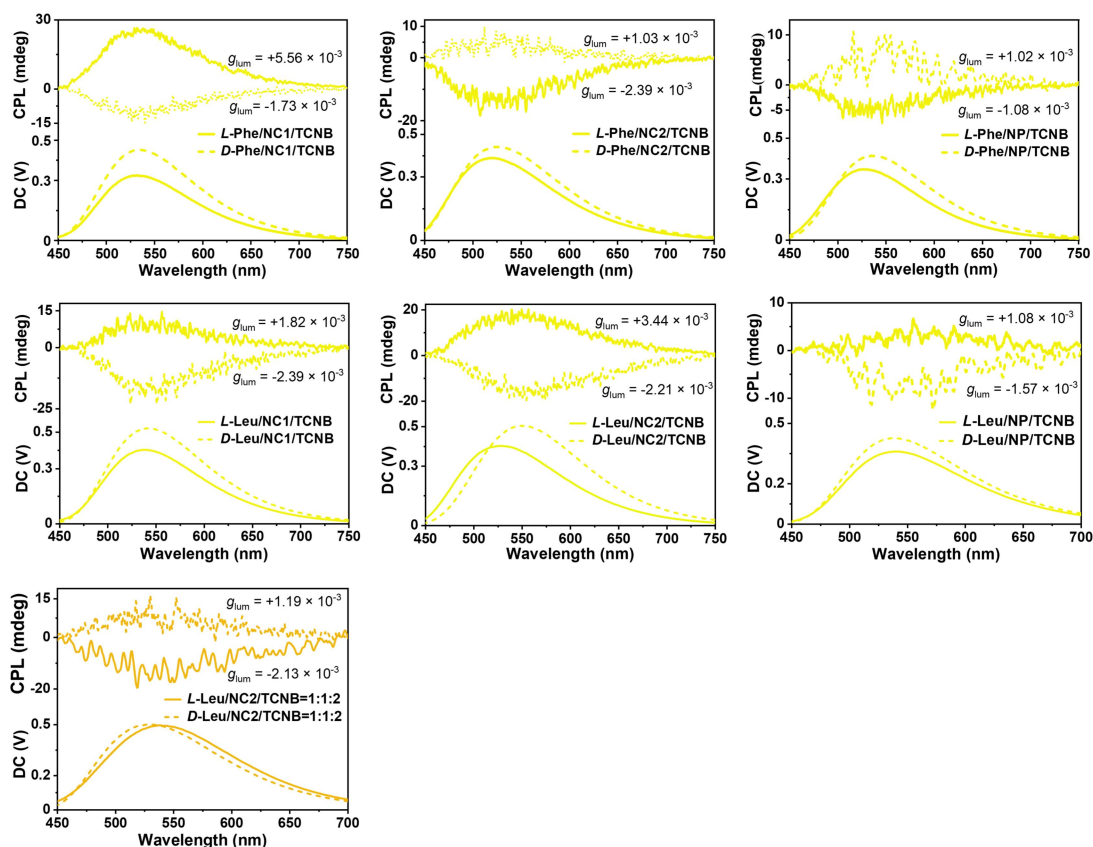

**Fig. S13** CPL spectra of *L*- or *D*-Phe/NC1/TCNB, *L*- or *D*-Phe/NC2/TCNB, *L*- or *D*-Phe/NP/TCNB, *L*- or *D*-Leu/NC1/TCNB, *L*- or *D*-Leu/NC2/TCNB, *L*- or *D*-Leu/NP/TCNB (3.8 mM:3.8 mM:3.8 mM), and *L*- or *D*-Leu/NC2/TCNB = 1:1:2 (3.8 mM:3.8 mM:7.6 mM) in DMSO/H<sub>2</sub>O (1/19, v/v) excited by 360 nm UV light.

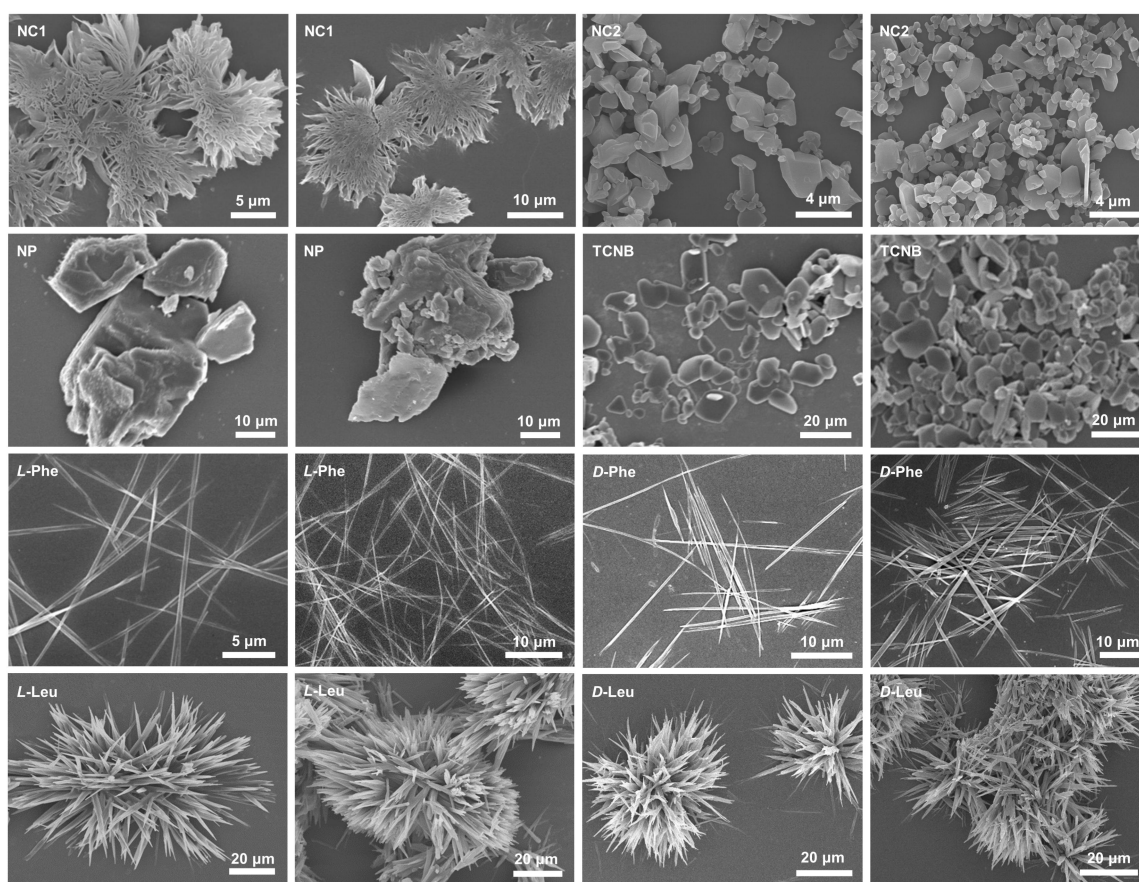

**Fig. S14** SEM images of individual **NC1**, **NC2**, **NP**, **TCNB**, *L*- or *D*-**Phe**, and *L*- or *D*-**Leu** (3.8 mM) assemblies formed in DMSO/H<sub>2</sub>O (1/19, v/v).

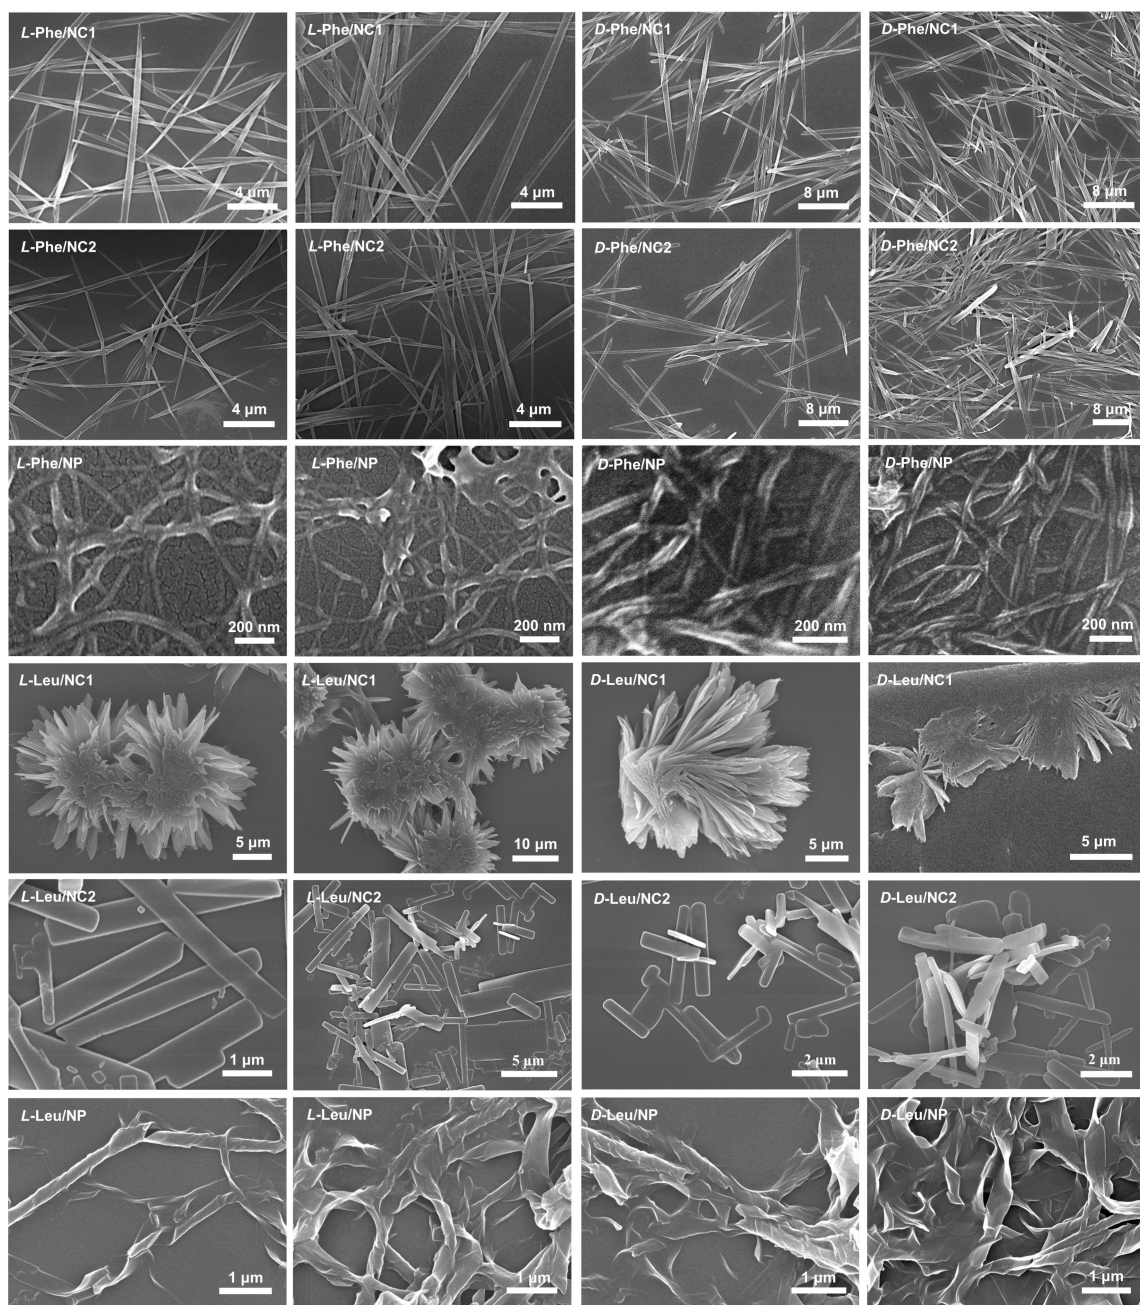

**Fig. S15** SEM images of *L*- or *D*-Phe/NC1, *L*- or *D*-Phe/NC2, *L*- or *D*-Phe/NP, *L*- or *D*-Leu/NC1, *L*- or *D*-Leu/NC2, and *L*- or *D*-Leu/NP (3.8 mM:3.8 mM) assemblies formed in DMSO/H<sub>2</sub>O (1/19, v/v).

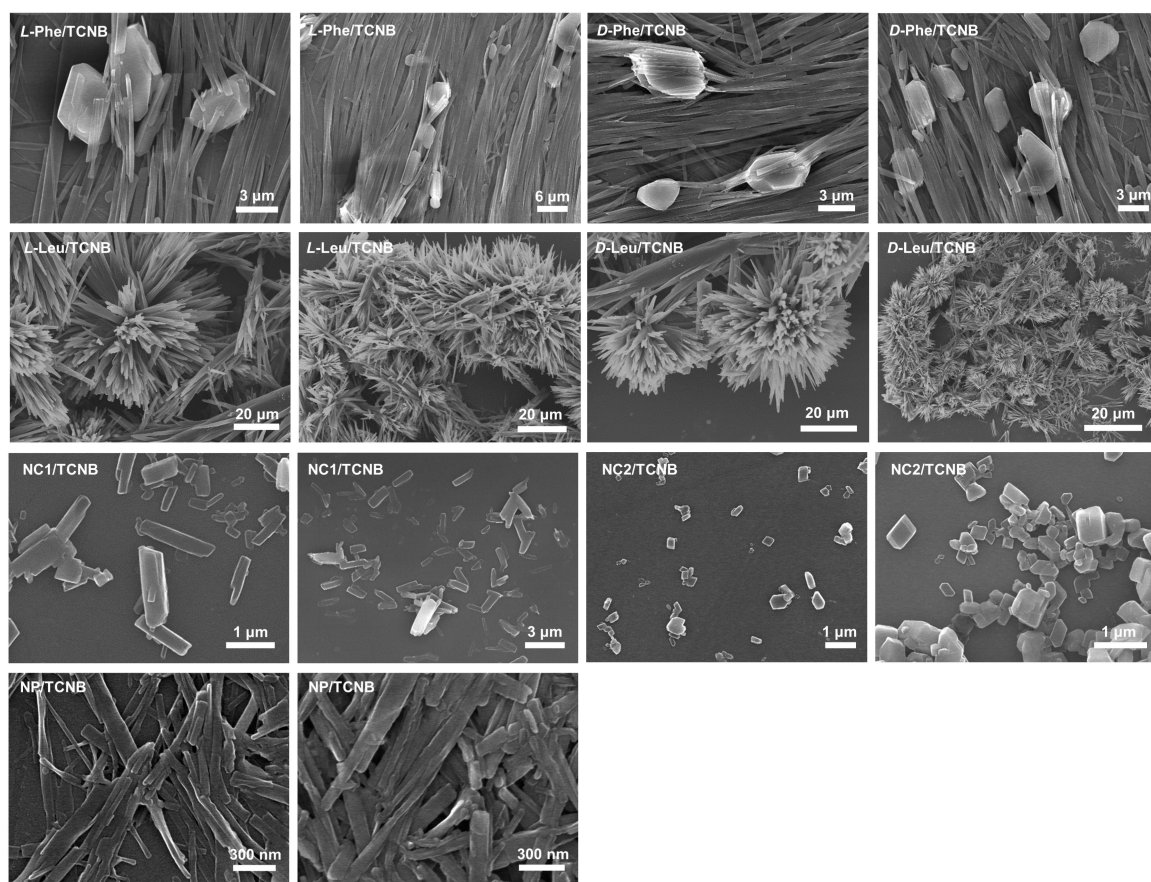

**Fig. S16** SEM images of assemblies of *L*- or *D*-Phe/TCNB, *L*- or *D*-Leu/TCNB, NC1/TCNB, NC2/TCNB and NP/TCNB (3.8 mM:3.8 mM) formed in DMSO/H<sub>2</sub>O (1/19, v/v).

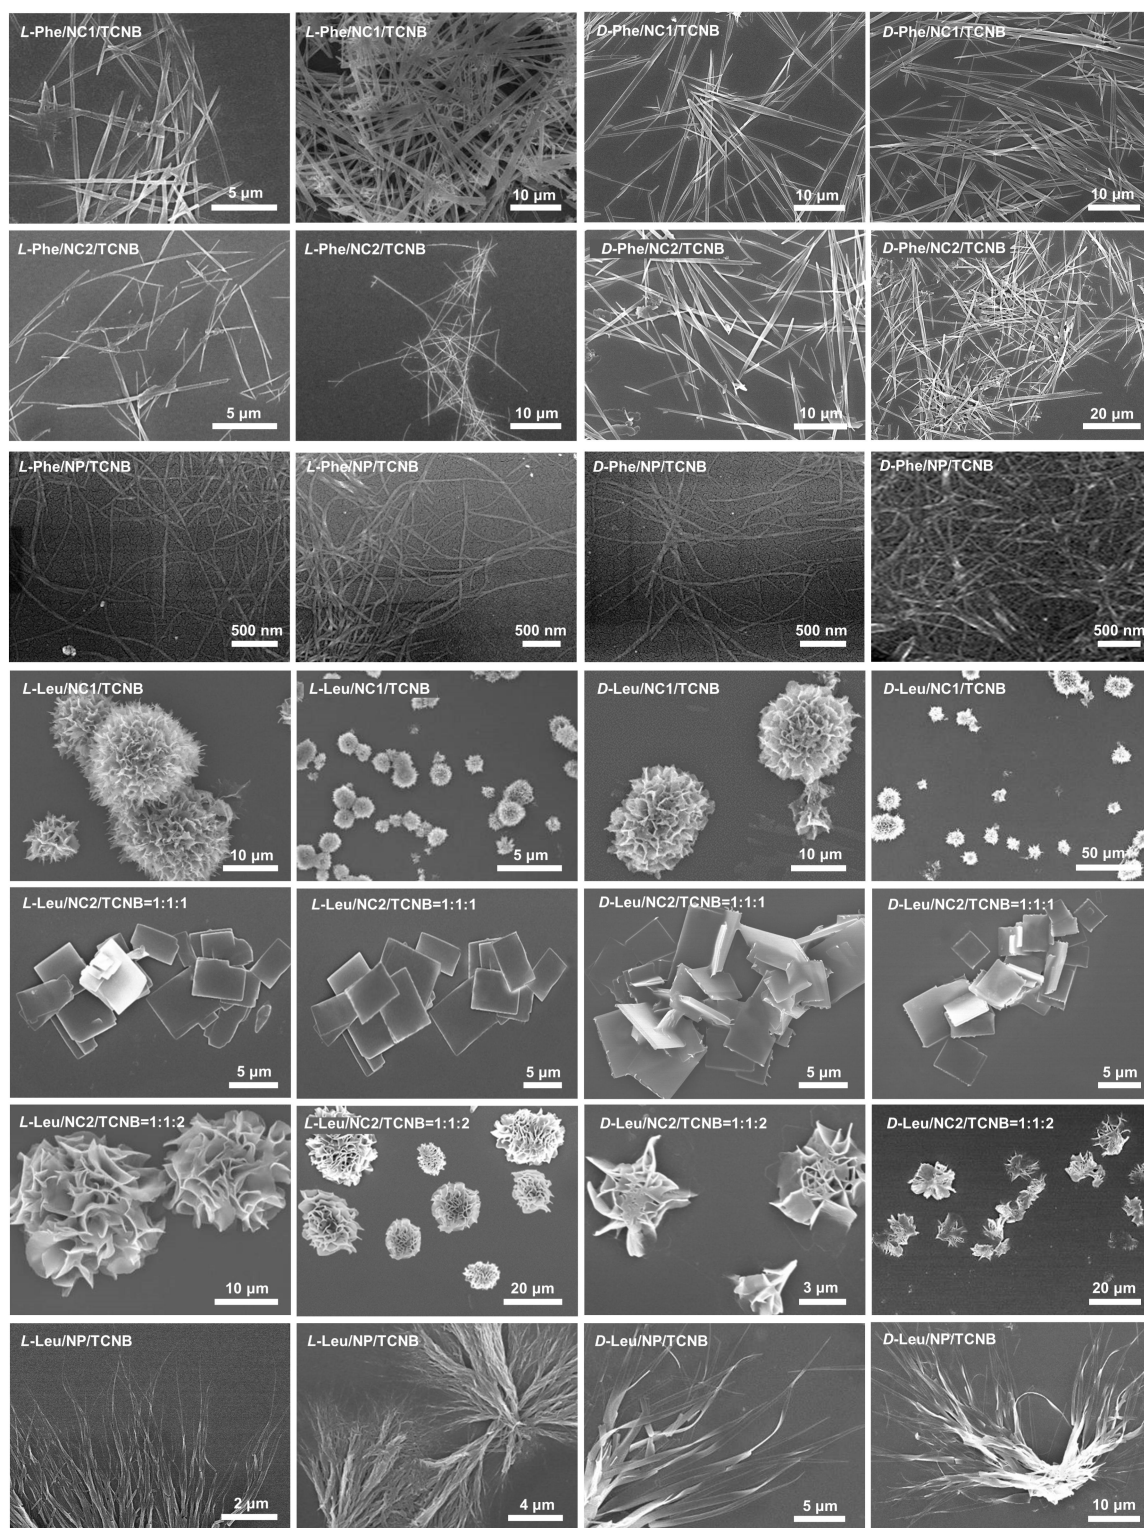

**Fig. S17** SEM images of ternary assemblies of *L*- or *D*-Phe/NC1/TCNB, *L*- or *D*-Phe/NC2/TCNB, *L*- or *D*-Phe/NP/TCNB, *L*- or *D*-Leu/NC1/TCNB, *L*- or *D*-Leu/NC2/TCNB and *L*- or *D*-Leu/NP/TCNB (3.8 mM:3.8 mM:3.8 mM), and *L*- or *D*-Leu/NC2/TCNB = 1:1:2 (3.8 mM:3.8 mM:7.6 mM) formed in DMSO/H<sub>2</sub>O (1/19, v/v).

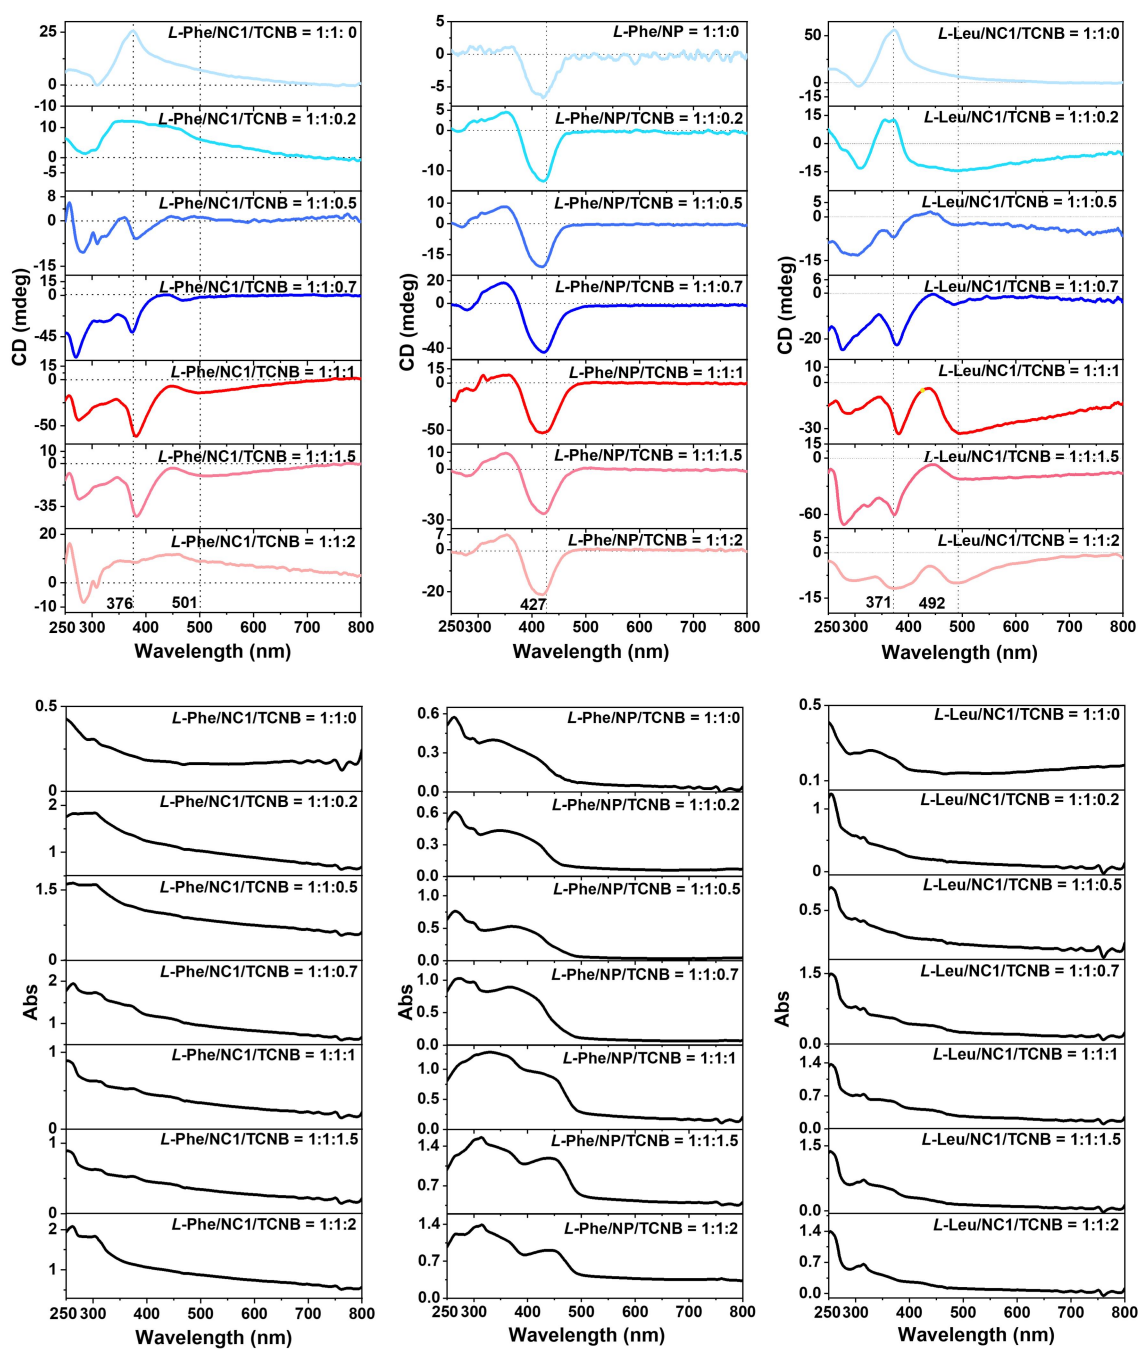

**Fig. S18** Molar ratio-dependent CD and UV-vis spectra of *L*-Phe/NC1/TCNB, *L*-Phe/NP/TCNB and *L*-Leu/NC1/TCNB in DMSO/H<sub>2</sub>O (1/19, v/v).

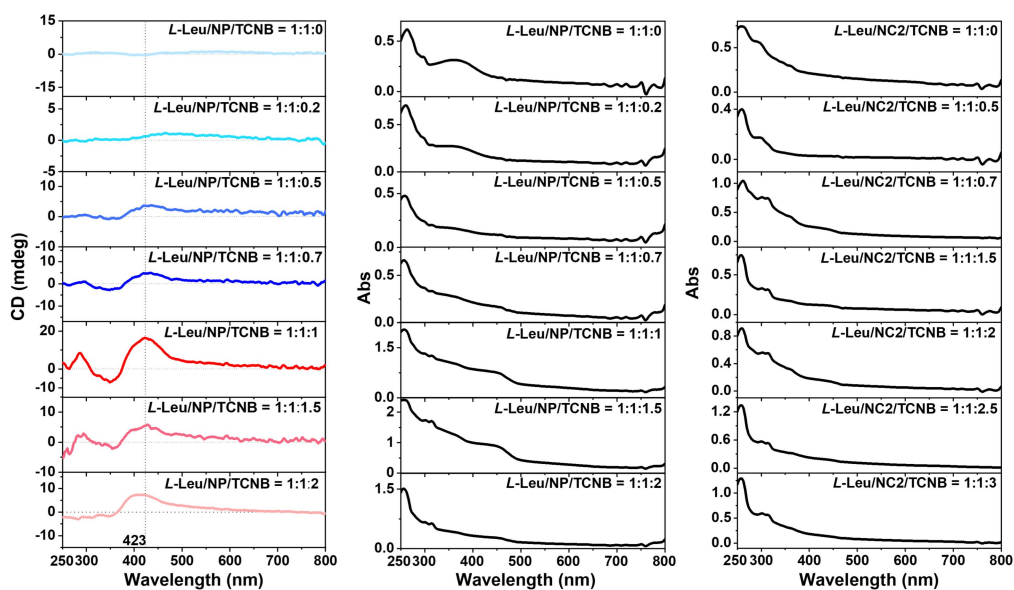

**Fig. S19** Molar ratio-dependent CD and UV-vis spectra of **L-Leu/NP/TCNB** and molar ratio-dependent UV-vis spectra of **L-Leu/NC2/TCNB** in DMSO/H<sub>2</sub>O (1/19, v/v).

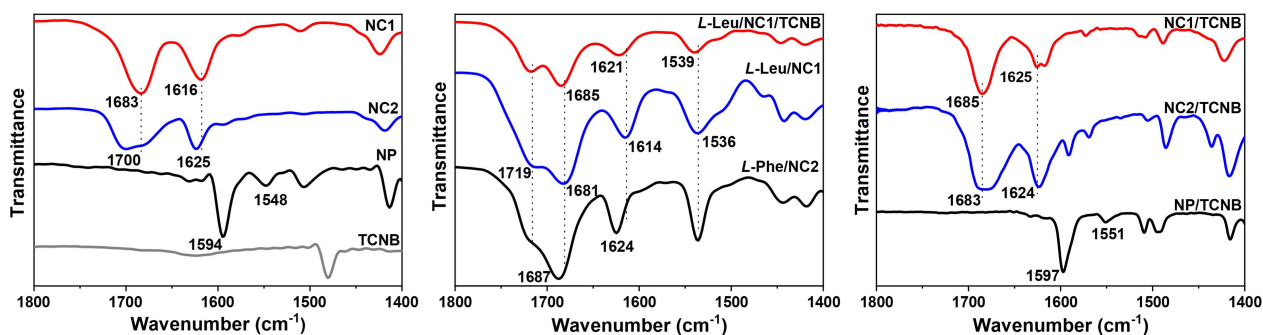

**Fig. S20** FTIR spectra of individual **NC1**, **NC2**, **NP** and **TCNB** assemblies (3.8 mM), and assemblies of **L-Phe/NC2**, **L-Leu/NC1**, **NC1/TCNB**, **NC2/TCNB** and **NP/TCNB** (3.8 mM:3.8 mM), and **L-Leu/NC1/TCNB** (3.8 mM:3.8 mM:3.8 mM) formed in DMSO/H<sub>2</sub>O (1/19, v/v).

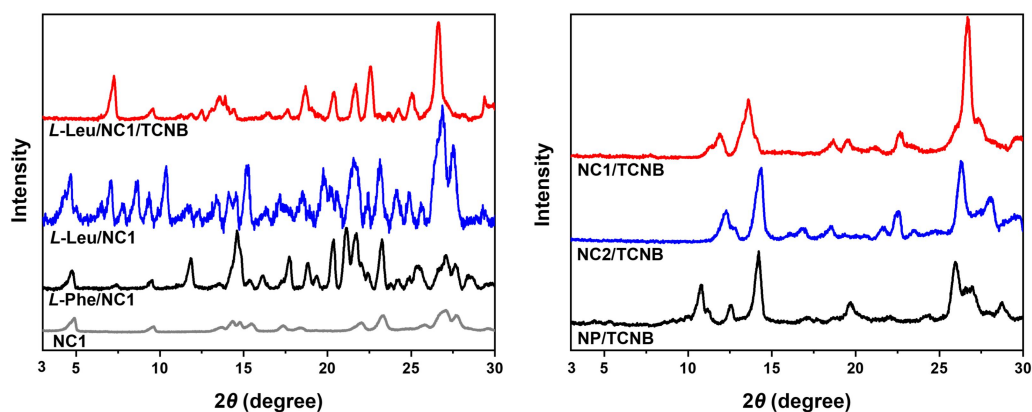

**Fig. S21** Powder XRD patterns of assemblies of **NC1** (3.8 mM), **L-Phe/NC1**, **L-Leu/NC1**, **NC1/TCNB**, **NC2/TCNB** and **NP/TCNB** (3.8 mM:3.8 mM), and **L-Leu/NC1/TCNB** (3.8 mM:3.8 mM:3.8 mM) formed in DMSO/H<sub>2</sub>O (1/19, v/v).
